# Supplementary material for: Fixed-point “blasting” triggered by second near-infrared window light for augmented interventional photothermal therapy
Source: Royal Society of Chemistry journal article supplement (doi:10.1039/d0bm00372g), 2020-01-01
Supplement: d0bm00372g1.pdf [file d0bm00372g1.pdf]

## Supplementary Information

### Fixed-point “Blasting” Triggered by the Second Near-Infrared Light for Augmented Interventional Photothermal Therapy

*Yongbin Cao,<sup>†, #</sup> Boshu Ouyang,<sup>§, †, #</sup> Xiaowei Yang,<sup>†</sup> Qin Jiang,<sup>†</sup> Lin Yu,<sup>†, \*</sup> Shun Shen,<sup>§</sup>  
\* Jiandong Ding<sup>†</sup> and Wuli Yang<sup>†, \*</sup>*

<sup>†</sup>State Key Laboratory of Molecular Engineering of Polymers & Department of Macromolecular Science, Fudan University, Shanghai 200433, PR China.

<sup>§</sup>The Institute for Translational Nanomedicine, Shanghai East Hospital, Tongji University School of Medicine, Shanghai, 200120, China.

<sup>‡</sup>Central Laboratory, First Affiliated Hospital, Institute (college) of Integrative Medicine, Dalian Medical University, Dalian, 116021, China. <sup>#</sup>Both authors contributed equally to this work.

\*Corresponding Authors.

E-mail: yu\_lin@fudan.edu.cn (L. Yu); sshen@tongji.edu.cn (S. Shen);  
wlyang@fudan.edu.cn (W. L. Yang)

**Synthesis of PLGA-PEG-PLGA copolymer.** The detailed procedure was described as the following: 25 g of PEG 1500 was added into a three-neck flask and heated at 130 °C for 3 h under vacuum to eliminate the remanent moisture. Then, LA (45.46 g) , GA (12.21 g) and catalytic amount of Sn(Oct)<sub>2</sub> were put into and maintained at 100 °C under vacuum for another 30 min. Next, the reaction system was stirred continuously and heated at 150 °C under the argon atmosphere for 12 h. After that, the reaction products were washed by 80 °C water for 4 times, and then lyophilized to obtain the final copolymer (PLGA-PEG-PLGA).

**Characterization of PLGA-PEG-PLGA copolymer.** <sup>1</sup>H-NMR spectra measured by a 400 MHz spectrometer (Bruker, AVANCE III) were used to investigate the chemical structure and composition of PLGA-PEG-PLGA copolymer. CDCl<sub>3</sub> and tetramethylsilane (TMS) were used as the solvent and the internal standard, respectively. The gel permeation chromatography system (GPC, Agilent1260) with a differential refractometer was used to determine the MW and distribution of the copolymer. The measurement was performed at 35 °C and tetrahydrofuran was used as the eluent at a flow rate of 1.0 mL/min. Monodispersed polystyrene was used as the standard for MW calculation. Rheological properties of the different composites were measured by a dynamic rheometer (Kinexus, Malvern) equipped with a Peltier cone-plate (angle: 1°, 60 mm diameter, 0.03 mm gap). Samples were loaded and sealed with a thin layer of silicone oil to prevent water evaporation. The measurements were carried out at an oscillatory frequency of 10 rad/s and a heating rate of 0.5 °C/min from 15 °C to 45 °C.

**CLSM Imaging & Flow Cytometry Analysis.** Prior to CLSM imaging or flow cytometry analysis, cells were cultured in 35-mm glass bottomed dishes at a density of  $2 \times 10^5$  /dish for 24 h, and then randomly divided into five groups: laser group, Gel-AINP/FMCP group, Gel-FMCP + laser group, Gel-AINP + laser group and Gel-AINP/FMCP + laser group. Afterwards, cells were stained with Calcein-AM (10 mM in PBS) and PI (2  $\mu$ M in PBS) for 15 min at 37 °C under 5% CO<sub>2</sub> atmosphere. For CLSM imaging, cells were subjected to imaging analysis with a confocal microscopy after replacing the staining solution with free RPMI-1640. Calcein-AM was excited by a 488 nm laser and the green emission (520 nm) was collected with a band pass-filter within the range 500-550 nm. PI was excited by a 564 nm laser and the red emission (620 nm) was collected with a band pass-filter within the range 600-700 nm. For flow cytometry analysis, after cells were stained with Annexin V-FITC/PI apoptosis detection kit, cells were directly digested and analyzed by a Gallios flow cytometry with excitation at 488 nm and emission at  $525 \pm 40$  nm and  $620 \pm 30$  nm, respectively. WinMDI software (version 2.9) was used to calculate cell apoptosis rate.

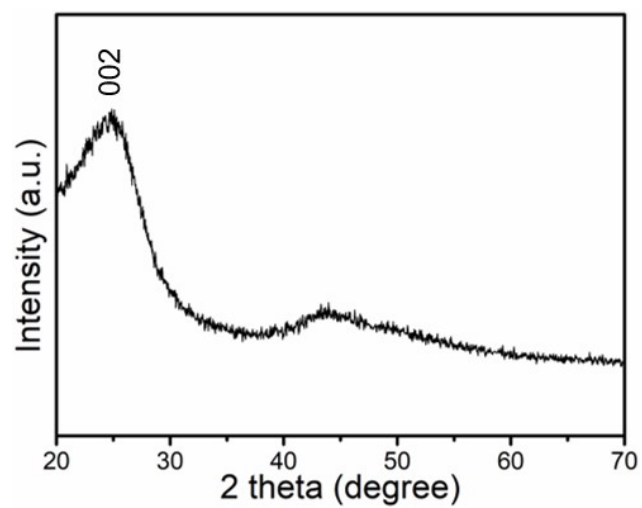

**Fig. S1.** XRD spectrum of AINP.

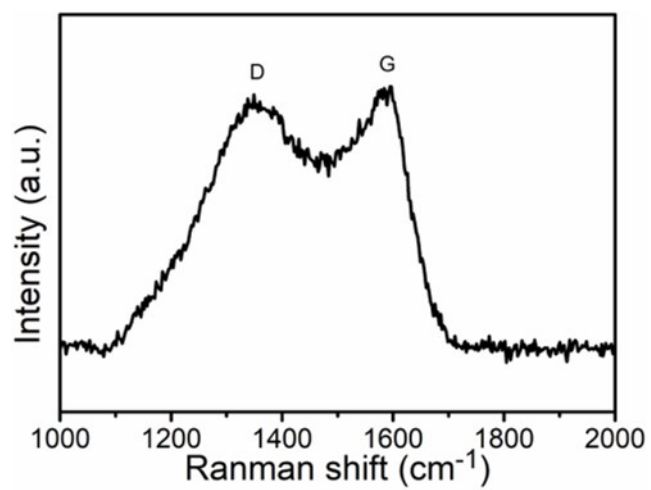

**Fig. S2.** Raman spectrum of AINP.

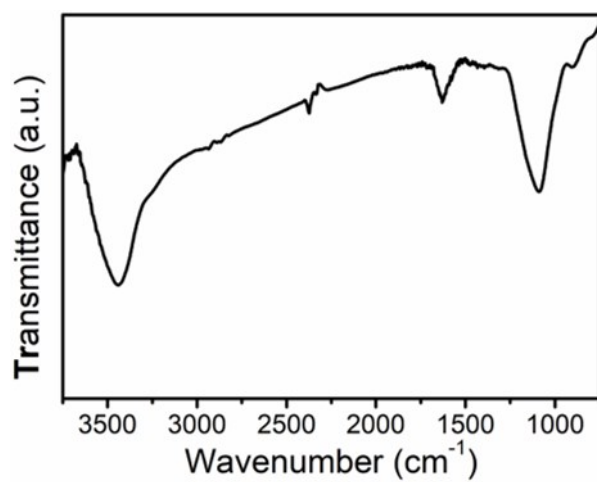

**Fig. S3.** FT-IR spectrum of AINP.

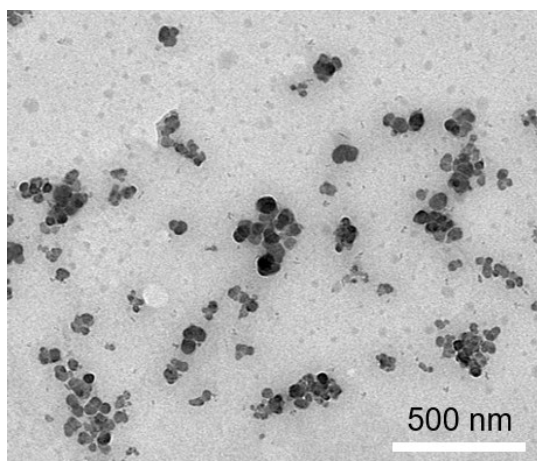

**Fig. S4.** TEM photograph of AINP.

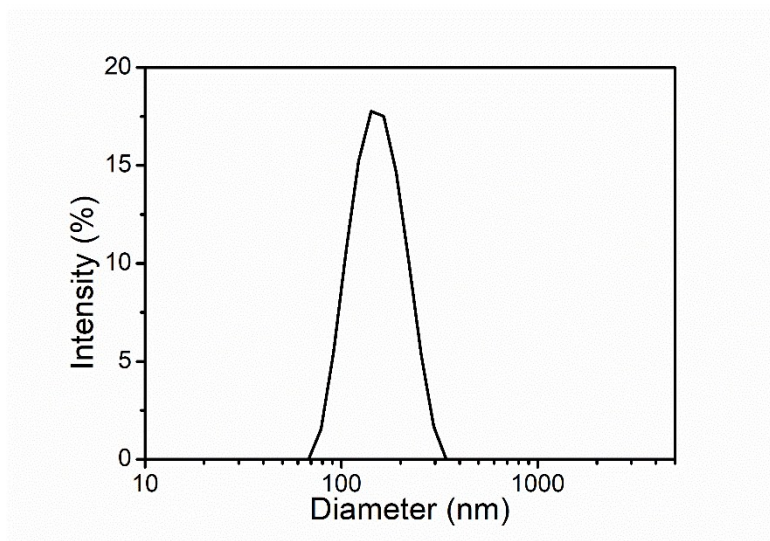

**Fig. S5.** Size distribution of AINP dispersion by DLS.

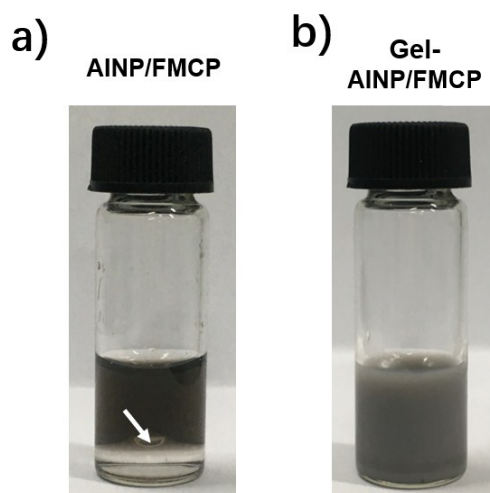

**Fig. S6.** Photographs of AINP/FMCP solutions with or without PLGA-PEG-PLGA copolymer.

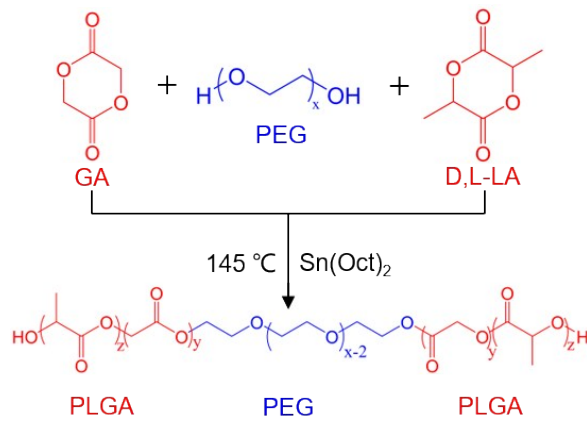

**Fig. S7.** Synthesis route of PLGA-PEG-PLGA copolymer.

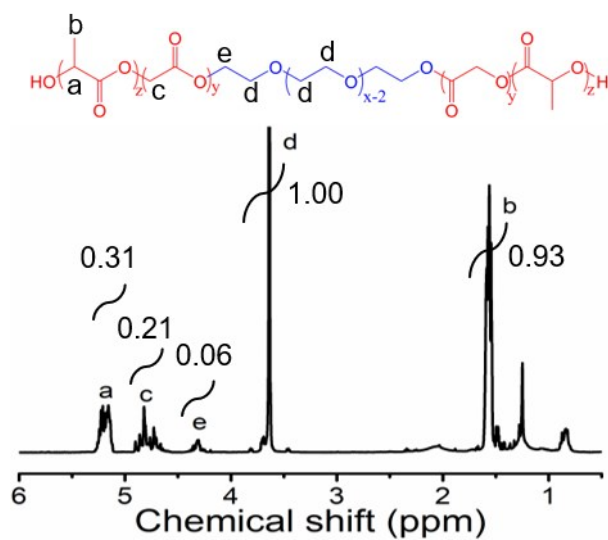

**Fig. S8.** <sup>1</sup>H NMR spectrum of PLGA-PEG-PLGA copolymer.

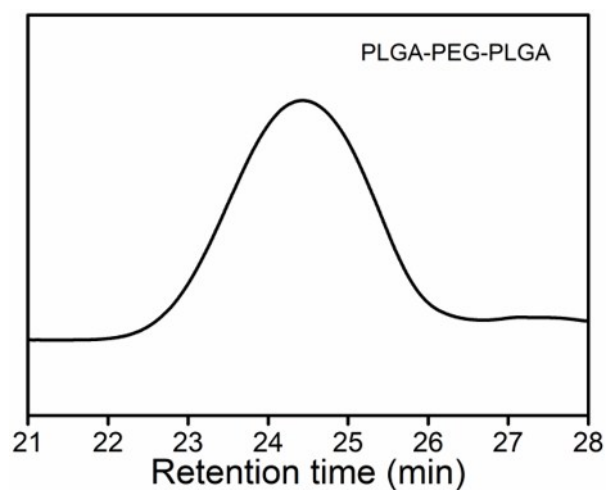

**Fig. S9.** GPC trace of PLGA-PEG-PLGA copolymer.

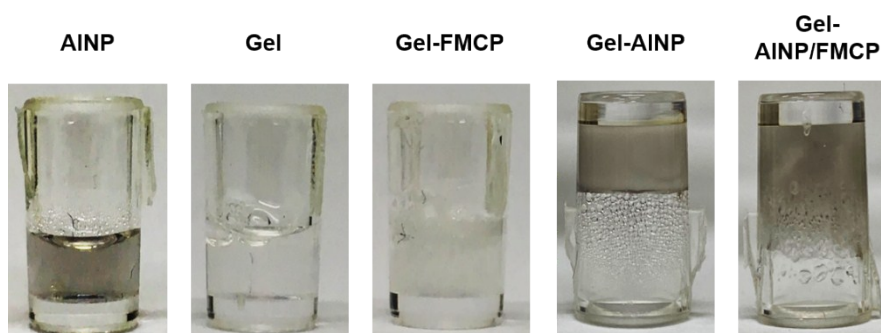

**Fig. S10.** Typical images of the sol and gel states of AINP solution and various copolymer solutions after exposure to NIR laser.



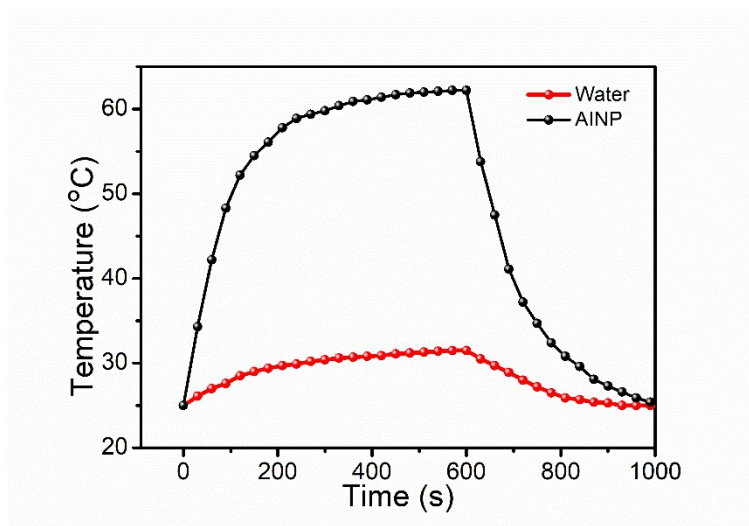

**Fig. S11.** Temperature elevation and decline curves of AINP dispersion exposed to a 1064 nm laser (50  $\mu\text{g/mL}$ , 1  $\text{W/cm}^2$ ).

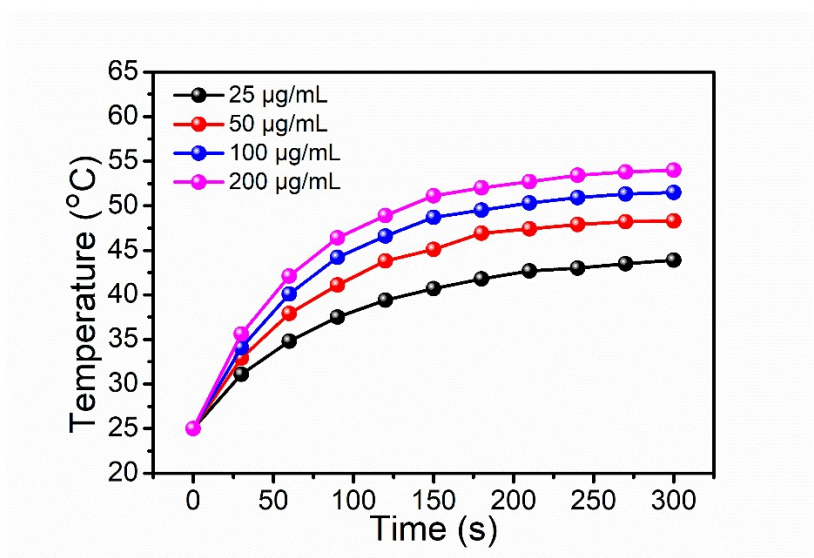

**Fig. S12.** Temperature change of hydrogel system containing various concentrations of AINP upon exposure to a 1064 nm laser (PLGA-PEG-PLGA: 25 wt%; FMCP: 5 v/v%; 0.5  $\text{W/cm}^2$ ).

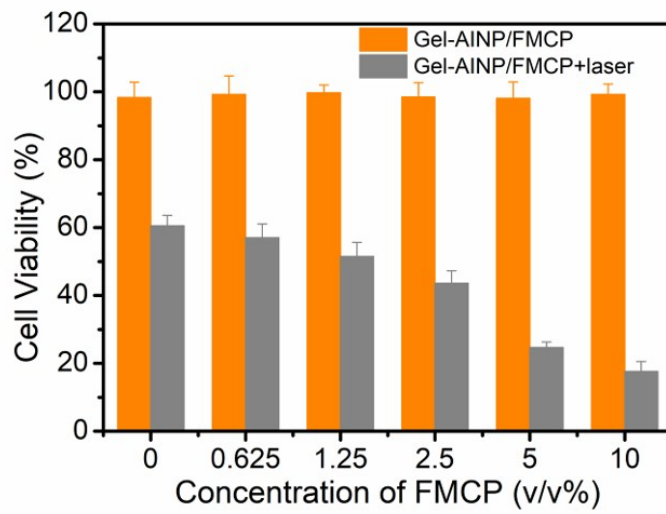

**Fig. S13.** The respective cell viability of HCT-116 cancer cells after treated with different concentrations of FMCP followed by a 1064 nm laser irradiation ( $0.5 \text{ W/cm}^2$ ; 5 min).

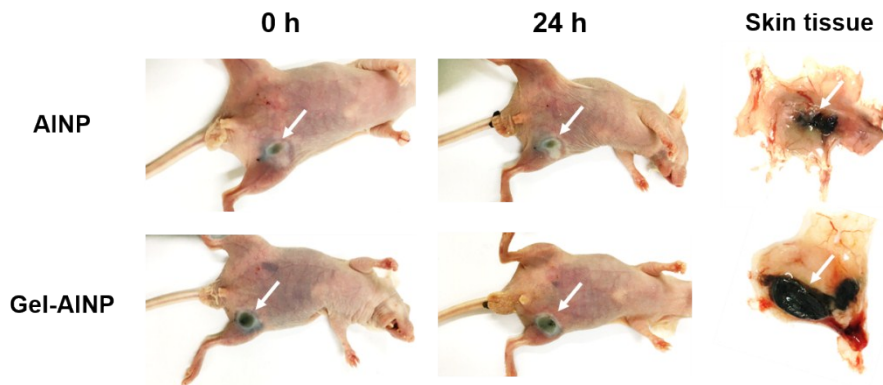

**Fig. S14.** Photographs of mice and their skin tissue after subcutaneously injected with AINP and Gel-AINP, and further exposed to NIR laser.

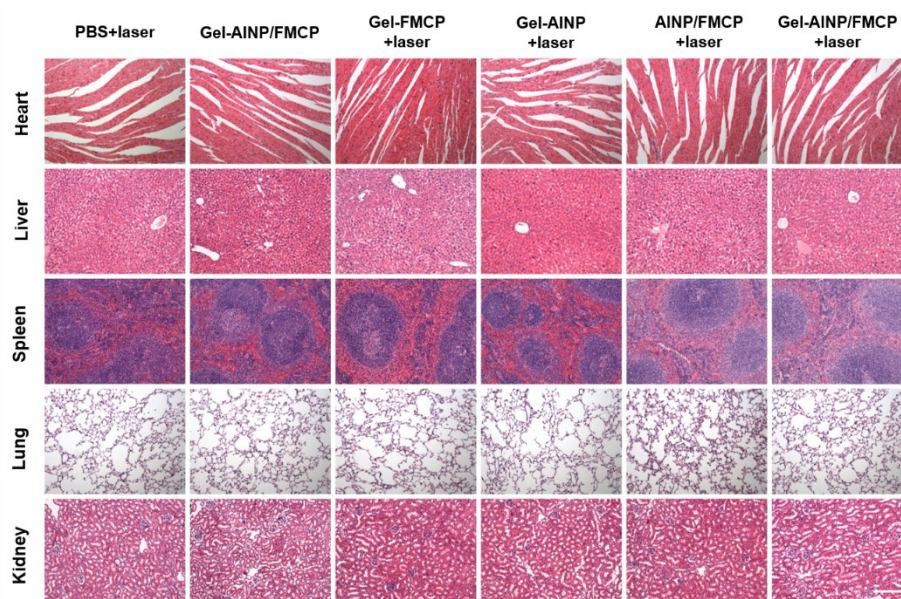

**Fig. S15.** H&E staining of the main organs of mice after different treatments. All the scale bars are 200  $\mu\text{m}$ .

**Table S1** Molecular parameters of PLGA-PEG-PLGA copolymer.

| PEG $M_n^a$ | $M_n^a$            | LA/GA<br>(mol/mol) <sup>a</sup> | $M_n^b$ | $(M_w/M_n)^b$ |
|-------------|--------------------|---------------------------------|---------|---------------|
| 1500        | 1830-1500-<br>1830 | 2.98                            | 4420    | 1.21          |

<sup>a</sup> Number-averaged molecular weight,  $M_n$  of the central block PEG was provided by Aldrich. Molar ratio of lactide/glycolide (LA/GA) and  $M_n$  of each PLGA block were calculated by  $^1\text{H}$  NMR.

<sup>b</sup> Measured by GPC.

**Table S2** Photothermal conversion efficiency of AINP and previous reported photothermal agents.

| <b>Photothermal agents</b>                        | <b>Laser wavelength (nm)</b> | <b>Photothermal conversion efficiency (<math>\eta</math>)</b> | <b>Reference</b> |
|---------------------------------------------------|------------------------------|---------------------------------------------------------------|------------------|
| <b>Fe<sub>3</sub>O<sub>4</sub>@CuS</b>            | 1064                         | 19.2 %                                                        | S1               |
| <b>IONP@shell-in-shell</b>                        | 1064                         | 28.3 %                                                        | S2               |
| <b>Bi</b>                                         | 1064                         | 32.2 %                                                        | S3               |
| <b>SPN-OT</b>                                     | 1064                         | 36 %                                                          | S4               |
| <b>Au-Cu<sub>9</sub>S<sub>5</sub></b>             | 1064                         | 37 %                                                          | S5               |
| <b>MoO<sub>x</sub></b>                            | 1064                         | 37.4 %                                                        | S6               |
| <b>(NH<sub>4</sub>)<sub>x</sub>WO<sub>3</sub></b> | 1064                         | 39.4 %                                                        | S7               |
| <b>Ti<sub>3</sub>C<sub>2</sub>@Au</b>             | 1064                         | 39.6 %                                                        | S8               |
| <b>Cu<sub>3</sub>BiS<sub>3</sub></b>              | 1064                         | 40.7 %                                                        | S9               |
| <b>Nb<sub>2</sub>C</b>                            | 1064                         | 45.6 %                                                        | S10              |
| <b>SPN-DT</b>                                     | 1064                         | 49 %                                                          | S4               |
| <b>TBDOPV-DT</b>                                  | 1064                         | 50 %                                                          | S11              |
| <b>SPN-PT</b>                                     | 1064                         | 53 %                                                          | S4               |
| <b>PPy</b>                                        | 1064                         | 64.6 %                                                        | S12              |
| <b>AINP</b>                                       | 1064                         | 47.6 %                                                        | This work        |

## References

- S1 X. G. Ding, C. H. Liow, M. X. Zhang, R. J. Huang, C. Y. Li, H. Shen, M. Y. Liu, Y. Zou, N. Gao, Z. J. Zhang, Y. G. Li, Q. B. Wang, S. Z. Li and J. Jiang, *J. Am. Chem. Soc.*, 2014, **136**, 15684-15693.
- S2 M. F. Tsai, C. Hsu, C. S. Yeh, Y. J. Hsiao, C. H. Su and L. F. Wang, *ACS Appl. Mater. Interfaces*, 2019, **10**, 1508-1519.
- S3 X. J. Yu, A. Li, C. Z. Zhao, K. Yang, X. Y. Chen and W. W. Li, *ACS Nano*, 2017, **11**, 3990-4001.
- S4 Y. Y. Jiang, P. K. Upputuri, C. Xie, Z. L. Zeng, A. Sharma, X. Zhen, J. C. Li, J. G. Huang, M. Pramanik, K. Y. Pu, *Adv. Mater.*, 2019, **31**, 1808166.
- S5 X. G. Ding, C. H. Liow, M. X. Zhang, R. J. Huang, C. Y. Li, H. Shen, M. Y. Liu, Y. Zou, N. Gao, Z. J. Zhang, Y. G. Li, Q. B. Wang, S. Z. Li and J. Jiang, *J. Am. Chem. Soc.*, 2014, **136**, 15684-15693.
- S6 J. E. Park, M. Kim, J. H. Hwang and J. M. Nam, *Small Methods*, 2017, **1**, 1600032.
- S7 C. S. Guo, H. J. Yu, B. Feng, W. D. Gao, M. Yan, Z. W. Zhang, Y. P. Li, S. Q. Liu, *Biomaterials*, 2015, **52**, 407-416.
- S8 W. T. Tang, Z. L. Dong, R. Zhang, X. Yi, K. Yang, M. L. Jin, C. Yuan, Z. D. Xiao, Z. Liu and L. Cheng, *ACS Nano*, 2019, **13**, 284-294.
- S9 J. J. Zhou, Y. Y. Jiang, S. Hou, P. K. Upputuri, D. Wu, J. C. Li, P. Wang, X. Zhen, M. Pramanik, K. Y. Pu and H. W. Duan, *ACS Nano*, 2018, **12**, 2643-2651.
- S10 H. Lin, S. S. Gao, C. Dai, Y. Chen and J. L. Shi, *J. Am. Chem. Soc.*, 2017, **139**, 16235-16247.
- S11 T. T. Sun, J. H. Dou, S. Liu, X. Wang, X. H. Zheng, Y. P. Wang, J. Pei and Z. G. Xie, *ACS Appl. Mater. Interfaces*, 2018, **10**, 7919-7926.
- S12 X. Wang, Y. C. Ma, X. Sheng, Y. C. Wang, H. X. Xu, *Nano Lett.*, 2018, **18**, 2217-2225.
